# Supplementary material for: Influence of benzene ring number attached on non-conjugated 3,4-ethylenedioxythiophene derivatives for solid-state polymerization
Source: Royal Society of Chemistry journal article supplement (doi:10.1039/c5ra10007k), 2015-01-01

Supporting Information

**Influence of Benzene Ring Number Attached on 3,4-Ethylenedioxythiophene Derivatives for Solid State Polymerization**

Lili Huang, Kai Peng, Tong Pei, Jiangbin Xia\*

*College of Chemistry and Molecular Science, Wuhan University, Wuhan 430072, China*

Corresponding author. E-mail: jbxia@whu.edu.cn

Tel & Fax: 86-27-67856707

**Figure S1.**  $^1\text{H}$  NMR ( $\text{CDCl}_3$ ) spectrum of 2-**{[Benzhydryl-(7-iodo-2,3-dihydrothieno[3,4-b][1,4]dioxin-5-ylmethyl)-amino]-methyl}-5-iodo-thiophene-3,4-diol (I<sub>2</sub>-3-Ph-EDOT)**

**Figure S2.**  $^{13}\text{C}$  NMR ( $\text{CDCl}_3$ ) spectrum of 2-**{[Benzhydryl-(7-iodo-2,3-dihydrothieno[3,4-b][1,4]dioxin-5-ylmethyl)-amino]-methyl}-5-iodo-thiophene-3,4-diol (I<sub>2</sub>-3-Ph-EDOT)**

**Figure S3.**  $^1\text{H}$  NMR ( $\text{CDCl}_3$ ) spectrum of **Benzhydryl-bis-(7-iodo-2,3-dihydrothieno[3,4-b][1,4]dioxin-5-ylmethyl)-amine (I<sub>2</sub>-3-di-Ph-EDOT)**

**Figure S4.**  $^{13}\text{C}$  NMR ( $\text{CDCl}_3$ ) spectrum of **Benzhydryl-bis-(7-iodo-2,3-dihydrothieno[3,4-b][1,4]dioxin-5-ylmethyl)-amine (I<sub>2</sub>-3-di-Ph-EDOT)**

**Figure S1.**  $^1\text{H}$  NMR ( $\text{CDCl}_3$ ) spectrum of 2-**{[Benzhydryl-(7-iodo-2,3-dihydrothieno[3,4-b][1,4]dioxin-5-ylmethyl)-amino]-methyl}-5-iodo-thiophene-3,4-diol**

**(I<sub>2</sub>-3-Ph-EDOT)**

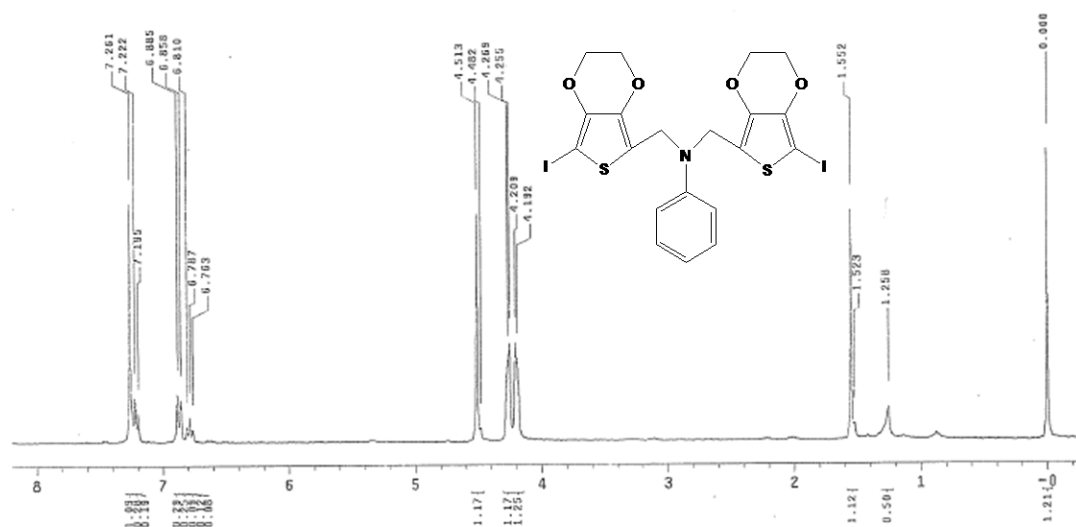

**Figure S2.** <sup>13</sup>C NMR (CDCl<sub>3</sub>) spectrum of 2-**{[Benzhydryl-(7-iodo-2,3-dihydrothieno[3,4-b][1,4]dioxin-5-ylmethyl)-amino]-methyl}**-5-iodo-thiophene-3,4-diol (I<sub>2</sub>-3-Ph-EDOT)

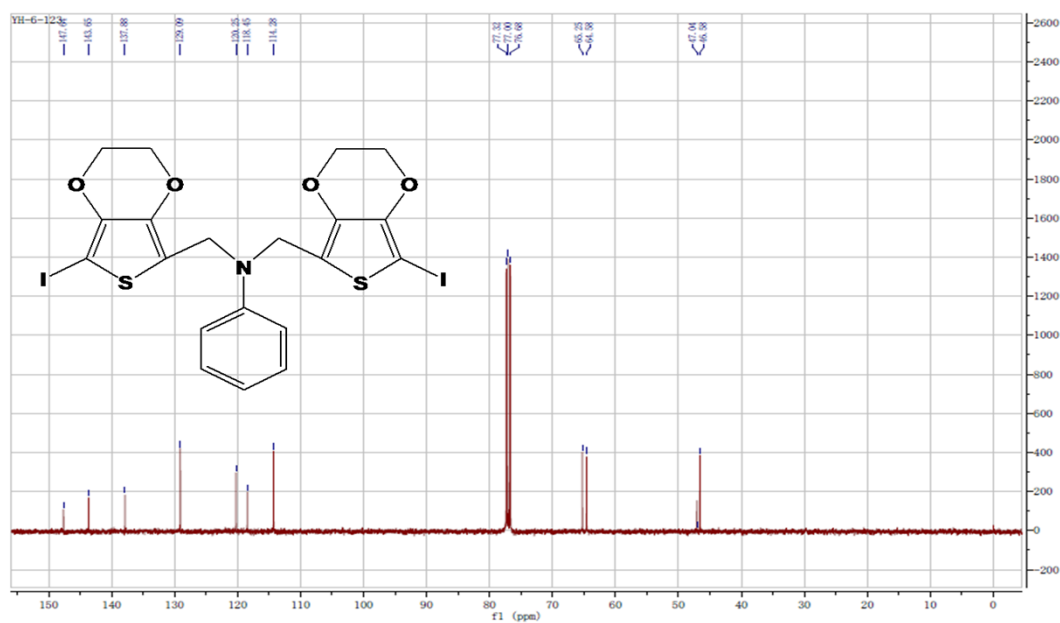

**Figure S3.** <sup>1</sup>H NMR (CDCl<sub>3</sub>) spectrum of **Benzhydryl-bis-(7-iodo-2,3-dihydrothieno[3,4-b][1,4]dioxin-5-ylmethyl)-amine** (I<sub>2</sub>-3-di-Ph-EDOT)

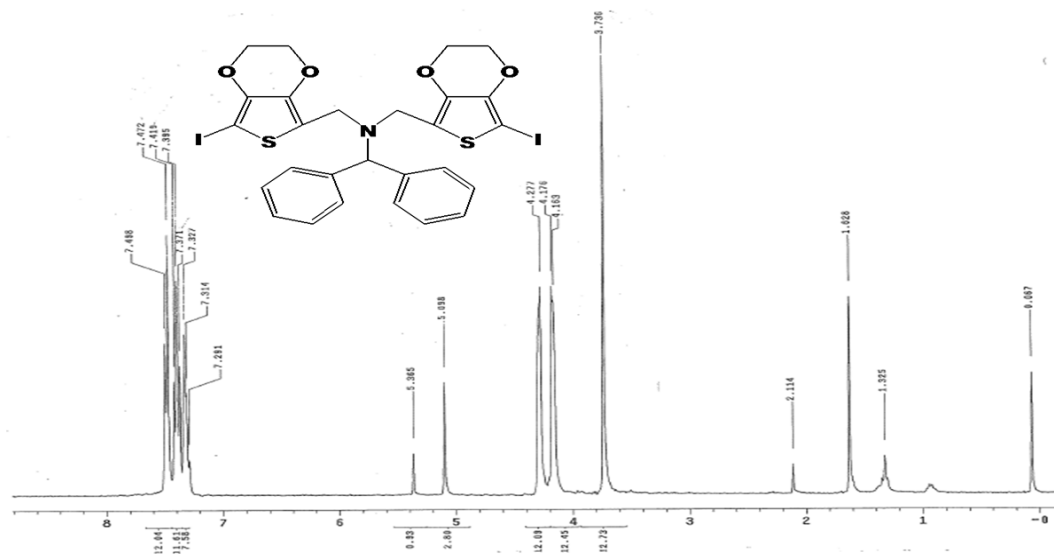

**Figure S4.** <sup>13</sup>C NMR (CDCl<sub>3</sub>) spectrum of Benzhydryl-bis-(7-iodo-2,3-dihydrothieno[3,4-b][1,4]dioxin-5-ylmethyl)-amine (I<sub>2</sub>-3-di-Ph-EDOT)

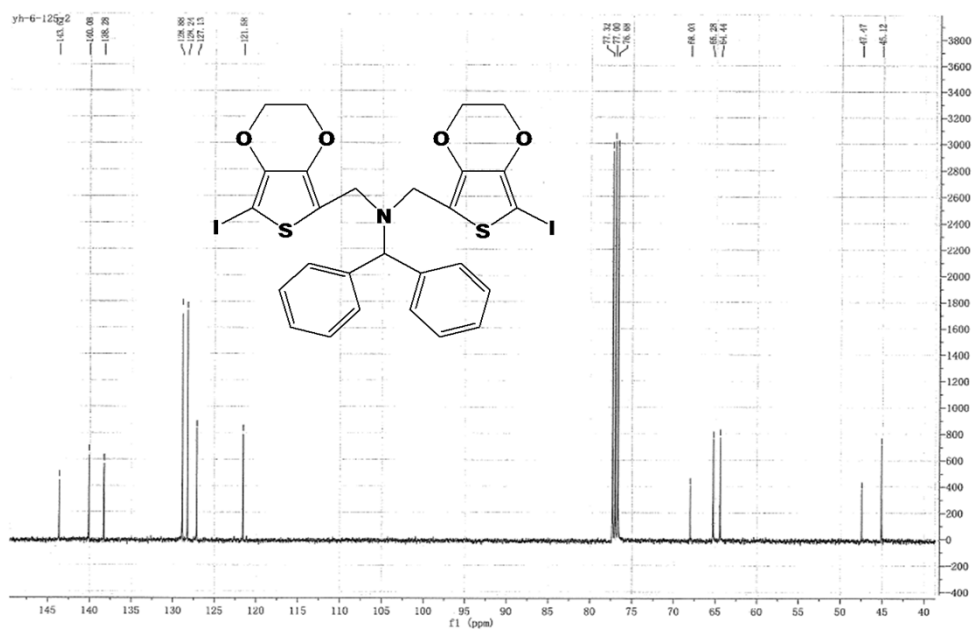

Supplement: c5ra10007k1.pdf [file c5ra10007k1.pdf]
